# Supplementary material for: A Genome-Wide Identification of the WRKY Family Genes and a Survey of Potential WRKY Target Genes in Dendrobium officinale
Source: PubMed Central journal article supplement (PMC5569039; doi:10.1038/s41598-017-07872-8), 2017-08-23
Supplement: 41598_2017_7872_MOESM1_ESM.pdf [file 41598_2017_7872_MOESM1_ESM.pdf]

# A Genome-Wide Identification of the WRKY Family Genes and a Survey of Potential WRKY

## Target Genes in *Dendrobium officinale*

**Chunmei He<sup>1</sup> · Jaime A. Teixeira da Silva<sup>2</sup> · Jianwen Tan<sup>1,3</sup> · Jianxia Zhang<sup>1</sup> · Xiaoping Pan<sup>1</sup> · Mingzhi Li<sup>4</sup> · Jianping Luo<sup>5</sup> · Jun Duan<sup>1\*</sup>**

<sup>1</sup> Key Laboratory of South China Agricultural Plant Molecular Analysis and Gene Improvement, South China Botanical Garden, Chinese Academy of Sciences, Guangzhou 510650, China;

<sup>2</sup> P. O. Box 7, Miki-cho post office, Ikenobe 3011-2, Miki-cho, Kita-gun, Kagawa-ken, 761-0799, Japan;

<sup>3</sup> College of Forestry and Landscape Architecture, South China Agricultural University, Guangzhou 510642, China.

<sup>4</sup> Genepioneer Biotechnologies Co. Ltd., Nanjing 210014, China;

<sup>5</sup> School of Food Science and Engineering, Hefei University of Technology, Hefei 230009, China.

\* Corresponding author: Tel: +86-20-37252993; fax: +86-20-37252978;  
E-mail address: [duanj@scib.ac.cn](mailto:duanj@scib.ac.cn) (Duan J.)

## Supplementary method 1

### Completing the 3' of DoWRKY genes

Seedlings of *D. officinale* (about 8 months after germination) were used to extract total RNA with Column Plant RNAout2.0 (Tiandz Inc., Beijing, China) according to the manufacturer's protocol. The first cDNA strands were synthesized by reverse transcription PCR (RT-PCR) using an M-MLV Reverse Transcriptase Kit and used as templates for gene cloning (Promega, Madison, USA). The two specific primers were designed for completing 3' ends (see in the follows table). Then a SMARTer RACE cDNA Amplification Kit (Clontech Laboratories) was used to generate b 3' RACE-Ready cDNA according to the manufacturer's protocol. The 3' ends products were purified by using the Gel Extraction Kit (Dongsheng Biotech, Guangzhou, China). The purified fragments were cloned into pMD18-T vector (Takara Bio Inc.) and sequenced at the Beijing Genomics Institute (BGI, Shenzhen, China).

Primers used for completing the 3' of *DoWRKY* genes designing by Primer 5.0.

| Primer names | Primer sequence              |
|--------------|------------------------------|
| DoWRKY4F1    | 5'-ACCCTAAGATTAATAGGGTTG-3'  |
| DoWRKY4F2    | 5'-GAAGAAGGTAAAGCACGAA-3'    |
| DoWRKY24F1   | 5'-GGTGGGAATCTAAGCTGTGT-3'   |
| DoWRKY24F2   | 5'-CAGATCGTGATGTTTTGG-3'     |
| DoWRKY26F1   | 5'-GAAGAAGGAGAGCAGGCCGA-3'   |
| DoWRKY26F2   | 5'-AGGAAGTATGGGCAGAAGAA-3'   |
| DoWRKY28F1   | 5'-TCAGCGATGGACAATATTGACC-3' |
| DoWRKY28F2   | 5'-CATACAGGGATATAAGTTTC-3'   |
| DoWRKY35F1   | 5'-GCCGTCGACTTTGTCTGCTC-3'   |
| DoWRKY35F2   | 5'-GCGGCCGGTCTCCCAGACGA-3'   |
| DoWRKY48F1   | 5'-AAGGGAACGTTATTAATGGCG-3'  |
| DoWRKY48F2   | 5'-GTCGACCGAGATTTGCCTTTC-3'  |
| DoWRKY54F1   | 5'-GCCGCGGTTCGGTGCAGAA-3'    |
| DoWRKY54F2   | 5'-GTGGGCCTGGCGAAAGTATGGG-3' |
| DoWRKY68F1   | 5'-GAGAATGACGAAGTGAAGA-3'    |
| DoWRKY68F2   | 5'-ATGATGGGTTCAAGTGGAG-3'    |
| DoWRKY70F1   | 5'-CCGATGTTGGTGGTGGTGGGAG-3' |
| DoWRKY70F2   | 5'-GGCGGCCTGTCGGGTCAACG-3'   |

|            |                             |
|------------|-----------------------------|
| DoWRKY73F1 | 5'-ATGGAGTCAAGGCTCATGTT-3'  |
| DoWRKY73F2 | 5'-ATATGCGTGCGAGCTGATCC-3'  |
| DoWRKY75F1 | 5'-CCGCTCTCTCCGACCTCCAAC-3' |
| DoWRKY75F2 | 5'-GAGGGTGCAGTCGTGGACGA-3'  |

**Supplementary txt 1** AtWRKY protein sequences used for alignment are as follows:

AtWRKY4 (AT1G13960.1), AtWRKY61 (AT1G18860.1), AtWRKY71 (AT1G29860.1),  
 AtWRKY14 (AT1G30650.1), AtWRKY6 (AT1G62300.1), AtWRKY56 (AT1G64000.1),  
 AtWRKY64 (AT1G66560.1), AtWRKY9 (AT1G68150.1), AtWRKY57 (AT1G69310.1),  
 AtWRKY36 (AT1G69810.1), AtWRKY66 (AT1G80590.1), AtWRKY40 (AT1G80840.1),  
 AtWRKY3 (AT2G03340.1), AtWRKY59 (AT2G21900.1), AtWRKY15 (AT2G23320.1),  
 AtWRKY17 (AT2G24570.1), AtWRKY60 (AT2G25000.1), AtWRKY25 (AT2G30250.1),  
 AtWRKY21 (AT2G30590.1), AtWRKY35 (AT2G34830.1), AtWRKY33 (AT2G38470.1),  
 AtWRKY55 (AT2G40740.1), AtWRKY43 (AT2G46130.1), AtWRKY46 (AT2G46400.1),  
 AtWRKY23 (AT2G47260.1), AtWRKY58 (AT3G01080.1), AtWRKY70 (AT3G56400.1),  
 AtWRKY68 (AT3G62340.1), AtWRKY22 (AT4G01250.1), AtWRKY47 (AT4G01720.1),  
 AtWRKY42 (AT4G04450.1), AtWRKY41 (AT4G11070.1), AtWRKY28 (AT4G18170.1),  
 AtWRKY31 (AT4G22070.1), AtWRKY29 (AT4G23550.1), AtWRKY53 (AT4G23810.1),  
 AtWRKY7 (AT4G24240.1), AtWRKY34 (AT4G26440.1) AtWRKY20 (AT4G26640.1),  
 AtWRKY18 (AT4G31800.1), AtWRKY13 (AT4G39410.1), AtWRKY62 (AT5G01900.1),  
 AtWRKY26 (AT5G07100.1), AtWRKY75 (AT5G13080.1), AtWRKY72 (AT5G15130.1),  
 AtWRKY38 (AT5G22570.1), AtWRKY30 (AT5G24110.1), AtWRKY50 (AT5G26170.1),  
 AtWRKY74 (AT5G28650.1), AtWRKY24 (AT5G41570.1), AtWRKY8 (AT5G46350.1),  
 AtWRKY48 (AT5G49520.1), AtWRKY27 (AT5G52830.1), AtWRKY2 (AT5G56270.1),  
 AtWRKY51 (AT5G64810.1), AtWRKY67 (AT1G66550.1 ), AtWRKY63 (AT1G66600.1),  
 AtWRKY54 (AT2G40750.1).

## Supplementary txt 2

The amino acid sequences of 63 DoWRKY proteins as follows in FASTA format.

>DoWRKY1

MASSSGSVEASSASFSFASPYEASFSDLLAGEGSANDRLTGLTVRFGDRGGGGGGIPKFN  
SIPPPSLPISPPPISPPSYFAIPAGLSPAELLDSPVLLSSNNILFSPTTGTFFPSKTFNWRGINSGSN  
DNEGREENRAYYDFSFQNKQRSSFQQQRDAFKGSQQPWNYPQESNIKTEIPAANSSEMQ  
TLQLNTQVNSNNNVTTTEQRKSDDGYNWRKYGQKQVKGSENPRSYKCTFPNCPTKKKV  
ERNFEGQITEIVYKGTSHPKPQSTRNSSSSSQPVHPLAIVAVGSAASEHSHGGRLGASNL  
DSVATPDDSSVSFG EEDVDLSSHKSNLAGDEFDEEPPDAKRLRREGENDGASAAGNKTVR  
EPRVVVQTTSDIDILDDGYRWRKYGQKVVKGPNPRSYKCTTMGCPVRKHVERASHD  
LRSVITTYEGKHNHDVPAARGSRPPEDNSHGTTTAIRPSAISAAPRNSLFGQRLDANFQSY  
NGPFTLDMLSTQRNYGSNYMNQQQLKTKEEPKDDMFLESLLI

>DoWRKY2

MESHSLSLDLTIGIAKQSILQEPSPPPCLQEELKRVTEENMKLTSMLATMCESYDALRAQLI  
DMIGPTAAVASSEGARSSSPSAKRKSTESAGDAANSVSSANSCKKAKEEGSKPKIWKLYA  
RTDPSDSSLVVRDGYQWRKYGQKVTRDNPCTPRAYFRCSFAPTCPVKKKVQRSADDQCLL  
VATYEGEHNHYQSSAAEVENAVSRKTAGTADGVGASGAPETKDSRGEREEARQPELRERL  
VKDMASSLTKDSNFTAVIAAAISGRFLGISTAQEM

>DoWRKY3

MEKSHSEDLKMLIDVLREGNGHVMELEAHLYNYETFSSSETCLLLSSKLQSTFATAIAIMKL  
MEQRGLPSLPSSATDSPRSQSSERTFKEQERREMCKKRKSLPRWSEQVKACSGSAMEIPL  
DDGHSWRKYGQKDILGAKFPRCYRCTYRHSHGCVATKQIQRSNNSSSLFDITYRGAHT  
CNHGFQKPSPLTNEQIIHQNSFKVKTEALSSNEQKSESSPYFSFPLTPKSLKLESNVFSSS  
SNPENYEGLDLEIADIVCASNSTTENSEMLKIDFGVEQFVFDSEFSDFY

>DoWRKY4

MLPSTAEISLREGLVESHEVPMDQTSHIRFSFQSSSLPPLTCHPLGIIQNRLFASSTDVVAEAS  
SSSSPHLKETALLSSVPLRASEAASTLLRSTTNPCWSWSEETTRGPRATVDTHKNIGSMSD  
KSIHENLSNYTVNPKINRVGNL SVGAMRMKVKARRKVREPRFCFKTMSEVDVLDDG  
YKWRKYGQKVVKNQHPRSYYRCTQDNCRVKKRVERLAEDPRMVITTYEGRHAHSPSH  
DEDDQSQPSSMRSQQLSTSFFW

>DoWRKY5

MMESGTDMMVSELYQIHELARKLNENLELSHYEICRSLAKEIICAIEKTICTAKSSSTGETE  
LAFFNGREFHVDRLNKEFSTDNEPKKSKKRKIMATGTSQVRVSSDPGADMPPDDGHSWR  
KYGQKDILGAKHPRSYRCTHRKTQGCAAMKQVQKTDENSSIFDITYLGTHTCFISPQHI  
ASKTSYYNPQQSLDQQNSLVHLGFETNLKLTSSDLNKDPTSSFSFPSTPIEGMENSEN  
VLCSSQRTECCYGVNLSSALMSPTSYESNCFTWPSCEMSSEVDYALTEIISASNSVA  
DLPVMDVEFMRDYEEMDAEILFDTSIFFE

>DoWRKY6

MASSSTPPIIDKEEEANEKNIAEERNDRMMAIQEDAYNWRKYGRDWEHYIHNKMFRTYL  
RCKNKNCKARKKVDWPPNDPNNKIISYEGDHNHIINEEQNRVVIPEDDYKWKICGQQNIK  
RIQKKRSYFKCVNKNCKERKKVDWPPNEPNNIDISYEGDHNHRALATGHSENEEVGIEAN  
ENDLTTLRLGPART

>DoWRKY7

MAGMDDDVSADFDDWLPSSISPKTLFSDDSSQKTNDGSLSEPRKPGVVVNDNSNQDCATGIQ

VSEEYSTELENNTYNVPKSSTRGALSKRIAGRAGFGNLTLDTSQIRKTSFSDSPSTNDRSPLITIP  
PGLSPTMLLDSPNLVSNLSLIEPFRSTDKMDCMVCDNIGAAINGDNIDHATEDIDPPLPSFKL  
PLLPFSCAESTPALSHPQPNPQDGFSTLSKEKGSTDTLNSNHNSNHVPILDDPQEGDDGP  
KGEFTSAFLVAPTKDGYNWRKYGQKQVKGSEFPRSYYKCTYPNCEVKKKVELSQDGHAT  
EIIYKGTNHLKSSIPLSHSGNDLQIDELDPNQYASVPIEQCEQSSPYAETPDGADASSFLSN  
DDEDEQETHGSASPD RSDSDGETESKRRKLDACALEMNAASRAVREARVVVQTTSEIDIL  
DDGYRWRKYGQKVVKGPNPNRSYYKCTNPGCKVRKHVERAAYDVKSVITTYEGKHS  
VVPTARTSNQASSSTASIITTAASPSSCLLQKKA EAARMADCLGRFDTPAPLPGFGLPSRDQ  
QLGPAVNFYSYARALQGFNPNVAMAGLGNQTFKMSVLPPLPAYMSQNHPGTVGYVVQTI  
MAKEEPAVNSRPPVPGNLSVYHLSRRPMGP

>DoWRKY9

MSENGGAVSSAAEVNRPSISLPPRSTVESLFRGGPAEASPGPMTLASSFFEPSEYRSFSQIL  
AGAMVSPSVSTTAFDARGGGGRERASLNLEHSRPMNLMVAPSPLFTVPPGLSPGGLDSP  
AMFSSNLGHLGMSHQHALAQVTAQASDSHSQMSQAEPSSLSSASLIQPISAMNMTSSQ  
PMLFITSGKNIHNTESAFASHSDQRSQPA AIVADKPADDGYNWRKYGQKQVKGCEYPRSY  
YKCTHPKCPVKKKVERS LDGQVTEIIRGQHNHERPIPNKRSKEGAAEVNGNTYPDNS  
LQQDDHLNFRSSDGMVGLSKKEREVSEQLSGSSDDEELED EEAEDGEPEHKRRNLETR  
VIESSSHRTVTEPRIILQTTSEVDLLDDGYRWRKYGQKLVKGNPHPRIHFRKLSNLMLYSL  
RKMYS ELAYS

>DoWRKY10

MSGEKL GELFQHDSTIFDPYSLFSLRSGGPQGLESGLPQFSGFLDYLSSTDFGFTSSLSQE  
PFGLIGDRHKVCKAEPRATENVISSVFAGGGTRAMTANSSVSSSTEAA GEEESDKNEKNE  
EKEQEEED EENKDVKGVDGAD EDEKAKTVSKSRKKGEKRQRQPRFAFMTKSEVDHLE  
DGYRWRKYGQKAVKNSRYPRSYRCTTQKCLVKKRVERSHEDPSIVITTYEGQHTHHYPS  
NVRGSSHMLANPQSSMPPSFHDLFLQTLTPPLQQFNLPANYHELLLQNSIHP SFINSNP

>DoWRKY12

MSSSAGSFEASSAIFSFSTPHTTSFSDLLCGADDASTADETSKSVRGFSDKGGGGGIPKFKSI  
TPPSLPISPPPFPSSSYFAIPAGLSPAELLDSPVLLSSNNRLLPSPTTGT FPLKAFNWSGNSGN  
HYEDKKDVNRAFSDFSFQTQQLNVFKGSQQSWNYQEPNIKTELSAPNVQANNTIKEQK  
KSEDDGYNWRKYGQKQVKGSENP RSYYKCTFPNCPTKKKVEKNLEGQITEIVYKGTNHP  
KPQSTRN SSSSSSSQSFQPLVSSAAASEASEHSHGVRSGTAMESVATPDN SSVSFGED EVD R  
NIQRTNRASEEFEEEE PDAKRWKKEGENEGASVAGNKT VREPRVVVQTTSDIDILDDGYR  
WRKYGQKVVKGPNPNRSYYKCTTVGCPVRKHIERASYDLRAVITTYEGKHNDIPAARG  
SSNHSANRPPALENAQAITTTIRPSPA VAANSRFGQRFDTFQHSHPFALEMLPTDQGHYDD  
GFGSGFNPSNSYMNHHQQQQQQQQQQQKQTGNLFPVAKEEPRDDMFFESLLC

>DoWRKY14

MTEKIEEKLD FMTGAISPFLDAIEPSFGGGFFDLAADIDAGDRGSFGFVDLLGIHDL PQVL  
LDTESYGASAAPALESSETQNF PATPNSSSISSSSSESPDADPTMPASNPPEAEDESAEHDQ  
AKKMGSSDSKGRKKKGQKRQREPRFAFLTKSEVDHLEDGYRWRKYGQKAVKNSPFP RS  
YYRCTSALCGVKKRVERSSNDPSVVVTTYEGQHTHPSPIIPRGTHHFSAPPELVDLHRFQ  
LQSSYVLSSQPSNFHPVVTAA PPSFPPPAPRPIPVLGFGERTYCD SATGIGLRDHG  
LLQDLIPSDVMMKREQ

>DoWRKY15

MAEGGGGGGLAAPVEEGAKRPSISL PARFTVESLFRGGVSEASPGPMTLVSNFFAEDPES

ECRSFSQLLAGAMASPAAITAPRKFLVEGEDTAAARTSVETTIADERGRGVGGGGGGGERG  
GASLNLGHSRPMNLLVAQSPYFTVPAGLSPGGLLDSPAMFSNSAHFGMSHQALAQVTAQ  
AAHSHTQIHSQAIEYSSLSISLPQQVSTTNITTAQPMQSITSASYKFASALIPHCDQKAQPV  
ALVVDKPVDDGYNWRKYGQKQVKGSEFPRSYYKCTHPKCPVKKKVERSLDGHVTEIIV  
KGQHNHQKPVPNKRSKEGAAELNGNSDPNNADCRPQGDLSNLNKSSEGMTSLCKRARE  
SGHGASEQLTGSSDGEELGDAEAGIDEAEYSGESEQKKRNLETRVIESASHRMVTEPRIIV  
QTTSEVDVLDGGRWRKYGQKVVKGPNPHRSYYKCTNAGCNVRKHVERASTDPKAVIT  
TYEGKHNHDVPAARNSSHSTHALAGPANRNNSAPHVVESNNQIINGISDLRNNVHRPIAVL  
QLKGEHEMT

>DoWRKY18

MAVDLIGYAKMEDKMSIQDAAAAGFRGMENLIFHLNRHQKSSSHRNIDCREIAEHTVSK  
FKKMISILNRTGHARFRRGPAVFASSVVTTPPQPSVSLHPTPAMTAPVVQLQGLTLDFTKS  
SPVSGASKVDLNLAAATSAKYIKNSFSMSAPMSSTNSSFLSSITGDGSVSNGREGGSSSVLL  
APAPASAGGAVRSKPLSSACKKQCPHAHSEDIAGRFAGGRCHCSKRRKNRVKKTIRVP  
AISSKMADIPSDEYSWRKYGQKPIKGSYPRGYKCSSLRGCPARKHVERAPDDPSMLIVT  
YDGEHRHSQPSDPIVSDNTHCKI

>DoWRKY20

MAGIDDSVSIFADWAASNPSRPTFISKFFNEDTCRPFPLDGDNTHFGFAEPENHKSAMVN  
NEEVEKPALVHSSDIFLEPVQFNVSKESSKGALESERMAARAGFSTLTVNTSRNGTESVIYSP  
SNKRCSYVLLSPGVSPTTLESFVLSNAMAQPSPTTGKFPFARAEDSNMFSTLISEETDKT  
NVQLIEDVHADAFTPCLGSSFPFLSPENKFALSIEEERTLVNMGSSLQPDLPVCFTEA  
SETKEIAEDVKADSFLANESSPPDDNQNVEDPKGGEFSSMASSAAEEDGYNWRKYGQK  
HVKGSEFPRSYYKCTFVNCPVKKKVERSLEGHVTEIVYRGAHNHPKPPSNRRSSTSSSQSF  
SDTQMDNSDYHVINANFDGKPTLVNAQNGNGGSEWRGDGIEAVSSTIAEFATSNSMQTI  
SGSRYDGEALNLPAMSNDDEEDDGATHGSFSMGDAEAGEEMDSKRRKLDLCTIDMSA  
ASRAMREPRVVVQTTSEVDILDDGYRWRKYGQKVVKGPNPNRSYYKCTNPGCTVRKHV  
ERASHDLKSVITTYEGKHNHDVPTAKTNSHQSTGLSNSTATGIHPTHSLHRKAIEPIQIILMR  
FENHAPVDPFALPSRDPQFGTAAGFAFGFGHQGLTSLGIGSLGPMGLRMPAFAPVQSYLE  
HQRKVDDGGFIIPKGEKPEPIESDLPSIANAPKGYQFANRLSLGPYL

>DoWRKY23

MMNELEELNRVERSIGDQTGDEFTMQELLYSSDLPLLPWKFTEREPLSPSKLISKMLHGS  
PMKARMSMSCSNGEFDGLSNYRPAIALPEKGLTAKMENKYTLRIKTYGINGVADDGYKW  
RKYGQKSIKNSPNRSYYRCTNPRCNAKRQVERSTEDPDMLIITYEGLHLHYTYSHFLHS  
QAHDLSITKKPKTNSVDVQPRFLDQDQQLQTVLQEP LIIGRDGQQDNNLVEVEGFGKSA  
MGDEIMQEETLYNNNKNRHC SQGLLEDIVPLMVRKPSSPTTSSNEPSYPSQASSPSYSSS  
LCWTPETFHFAESVLSSIV

>DoWRKY24

MCRSCVQKNNHRLKSTRVSFKTKSDRDVLDGGRWRKYGKKMVKSSSNPSMFLGHLQP  
NGILWFACSSRDCTERQIERCFRVLNSATPKEKTQKAFLGVRVEMFGNWKHAIGKWCSI  
RLEMPHWHQKECISRAI

>DoWRKY25

MSEMSISGAGDHVASSIPPEISTTSAGARYKMMSPGRLPITRSPCLTIPPGFSPGALLESVLL  
TNMKAEPSPTTGTFAMPLILNNGLAALGSPKDSSKGCVSEDGSSPYFEFRPHIRLSSRPGL  
SSLAPLGSGLNSKQQEFVEKNQCLDNTGSSSSQVVKTECIAQSSPESTWSATASGSPVE

VFTLKANGFCEDASNELQLTKDLDCRIQASQSDQNGSNPLNAVEKSSSEDGYNWRKYGQK  
HVKGSEFPRSYYKCTHPNCQMKKQLERSHDGHITEIYKGRHDHPKPQASRRSAVGGVST  
GQEEEKEDGLSCFANFEEKFSNAHCHSSHVNPNCNSELSPVSVSDDEVEVGGGQSGLGGD  
DAADDDPESKRKMEVATIDANSIAKNNREPRVVVQTVSEVDILDDGYRWRKYGQKVVK  
GNPNPRSYYKCTNPGCSVRKHVERASHDPKAVITTYEGKHNHDVPAAKTTNNNNRESSPP  
LITDANIPRTYITHQYSQPEENAINLHLGVGVGSNHNLLNEKQHLSGLERIPSHHHHHH  
HHQYISSDCNNVMIQLNPVSKLYGSSNNVVFSGSRDNKGEGFSFSTQMNNSSSHYYPRADN  
LVMGP

>DoWRKY26

MEPQQNFPPILSQQPPFPILPEASGLHFCSSSILGGDEQNKGKGRGKESRPRFVFQTRS  
ESDILDDGFRWRKYGQKKVKNCSFPRSYYRCSQLTCNVKKQVQRLSSDAIVVTTYEGV  
HNHPCEKLMETLSPLLNQMQFLSQFQ

>DoWRKY27

MENKIDSTTGDPTWDFSSDGGGIAYLYGEGDGGGHGWAPPRIHEEDPDTWCSLPPDLS  
EASGSAAARSGGDAVSSSSSEGPPADPGDKPPADSPNNKTSKVKVQKRVRQPRFAFMKSEI  
DHLEDGYRWRKYGQKAVKNSPFPRSYYRCTNSKCTVKKRVERSSDDPSIVITTYEGQHCH  
HTVNFRAAAIGFHDHIRTSSLLENISPPPQQQQQQLYFPATTSLQSVPELPTVLPNDGGL  
GDIVSPGMRGRR

>DoWRKY28

MNCTEPCRRRVQRWTILTSVPHFDGYEWRKYGEKNIQGYKFPRSYYKCTHNKDQGCPA  
TKTIQQKEDNDCNPPKYEVIYSLHHICKTMGTNTHLDKKYSSAPINNTSSTTTTSSCQANS  
SQPLTLVADQLCPMESMLLSAEPQIEENGGIENSNTKSSPSTDLDLDFDSEWAKWLLSCTEK  
A

>DoWRKY30

MEEGSRIAFRTQTDEENLDDGFKWRKYGKKSVMKNSPNRNYYRCSTEGCLVKKRVERDN  
EDPSYVITTYEGIHNSHSSPGVVYYATQDSVSGRFHLSGEKWKEKNIALKVVDSDQSQL  
KNEDGIFLMIRQFRSFLKRKQRRHQQWIKGKFNKNVKASNDVIYYECKKLGRIKSECLNL  
KANPNKEKVDEKNSVKKGN

>DoWRKY31

MCDYFWQRMDQNNQGDLSDFRNSSSHTSNDSWHPLPEPAGAFAPPSNLFGDPFAEIGDP  
LLGEFATTNYFNSSETTIVKTNSTGRSDDCGAQKMLLEEGKSSIFSRMLQISPVIPSKMSA  
EIGPSPLVGTMAGDSSGCLQISSTRVQGIKRRKSQVKKVVCIPAPAAASGRPSGTGEVVPSD  
LWAWRKYGQKPIKGSYPYRGYYRCSKSKGCSARKQVERSRTDPNMLVITYTSEHNHPWPT  
QRNALAGSTRSHPSKSNNSASTSKNSPHNLNQLATNIKEEHKECSSSTINLVKEEAYEME  
KALVDPQDHDQVDFDESTFMMSDSNQPDFFADLAELESSDPMNLIFPKGFMGDHHA  
KLDEERERNKALDPFNMFDWEGGSSIEETKRGL

>DoWRKY32

MDFEKKKPPISFEEGGKMGDLCTSDDSSELIGFNVQKSCLKGVHNEKMAEMARLNMLK  
AFVSQSDQENIMFEINSSQNESKNLISSLPEESSYMLLSPGVNLSSMEYLDNFSVSLQALP  
DNNASLQENFELLEPFGRKEKTHDIAANQKASHFLDVNGSPPPPPDDHQNAEKGVNVEF  
SSFPESDPTKDGYNWRKYGQKQLKGCEFPKSYHKCTHPNCPVRKKIERSLQGHITEIYK  
SHNHPKPPNHRSSFSSSKQLHG PQSVSADHPGSVANFKGNPSLASSYDGFKPKWSDGF  
GGTSSASFTEFNDPSNVLKSSQLELESMESSSCVISIDKEDNEATHSSLSADYNIDQEMES  
KRRKQELCSIGRNTTSRAMRDRRIVVQIPSDLDIPYDGYRWRKYGQKVVKGNPNPRSYY

KCTNRGCSVRKHVERASDDLNSVICTYEGKHNHDVPSARNINLARYFPSSLAETAAMQLP  
GLYTRPELAQDSFMSLENCAPICTYGLLGRGKQLEPTTSFSFGFDQSNLASLCPGSDLMR  
RFKMPFFPIHQNMDRQVSSGNIIPMREPKNPEM

>DoWRKY33

MCDYFWKRENSQGDLDIFQSGGAALAGSAVAADIPTTITDHTWQPSPDPATALPLQN  
NCFLDNFANIKDPMLHELAGTGFFGSSEKTAPSNNLSSMAITVIRQPPPLVGLTDTMKVGG  
DVAISLPQTPAVKRRKNQARKVVCIPAPAVASNKPGGEVVPDLWAWRKYGQKPIKGSPPY  
RAEAIELGGTGTEVKEKKIDKCFVNQSRALLSFYTEQFLASPSLSISLCAFDLLHYGRRPD  
ICIKSRNLEGRANFKKKGYRCSSSKGCARKQVERSRTDPNMLVITYTSDHNHPWPTQR  
NALAGSTRSQSSKNNNNNASSKSSSINQKLPSSEITVREEEEEEEAKLISPISSFPFVKERK  
DMENSTVVEHLHDFNQVFFQKSLKELEPDDFFADLAVLDADSMMLDEEKNDKKTMDPF  
NMFGWDGGNSFGVTKRG

>DoWRKY35

MFAMEKNDDGWDLFAVVRSCRAASQPPPPPLPTAKPAEAPSTSFYNEVEEFCKPFFSMVQ  
QPKPKPSTLSCSSSLAGAAARAAPRRPVSQTKYRSKKRSLRRILRWNQQRVVCEVPADG  
LAADMWAWRKYGQKPIKGSPPYPRGYRCSSSKGCARKQVERSRTDPAMFVITYTGDHN  
HSLPTHRNSLAGSTRQKFSSAASVGEESRTVCLPSTPLKREESGEEEEEEEEEDDDDEGIL  
LVEDMEVVAEDEVLFMGLEKLQDSPVAAAVTTGAVSEFFGGESCCFEDSFFLHSWSEESS  
SGATAAAGGCNT

>DoWRKY37

MQQFDGNGRMLQRVSTKLSVSTYGEDDLISLIQTLYIKQPPSSTMVSGYDSEPEWLEYKIK  
ETNMLTVDKYQQIGFFPTEKAFSLRYQTAGMLETVLRAGVLGEDDIGEESPRNLKLPSPFP  
SVCENCLYSLKEDMRIRAFHIMDPKGVVDMLLIFLEQRDDAPSSISSFSLQDVPDRIIFL  
GKWKGHSITKRSVYGATIAEADTVAFLELDENGQVVQMRMVRFLCSNSMAENIRTEAT  
GHTEAKRPSISLPPRPSDESLFRLEPAEASPNPMNLVSSFFSEDPESDCRSFSQLLAGAITLPE  
TRTTAEAATGEGRGRGGGLNLGQSQAMNLLAGQSPFFMAQSDLSPGGLLDFPAMFSSNL  
MQGQLGLAHQQAHSQMQMHLQSENPSLFSASLSRSFPTVKMPKVLHMPATTLDSNAY  
CSEVASASHSDQVPFPVPIVVDKPVDDGYNWRKYGQKQVKGSEYPRSYKCTQPNCVPK  
KKVERSDGQVTEIYKKGKHNHQPPSNKRKKEANMPNGSAELNGHIGFPTNSESHSQGN  
AITGLSKRDRESGNVAYDQLSGSSDGEEVDHEGMDERDYGESDQKKRNLETKLIESASH  
RTVTEARIIVQTTSEVDLLDDGYRWRKYGQKVVKGNPHRSYKCTNAGCSVRKHVERA  
SKDPKAVITTYEGKHNHDVPAARNSSHSTAAAASNSSKPQNIHGRSDPLNNVHRPIAVFQL  
KEEREIM

>DoWRKY39

MSTKEAKTDASRKKPSGEVGGDFIRKETAVAVKLEESQPKSDREVDGSILLPAPANETLAG  
RKSSAASPIVAVPSTSAGDCRSFLQLLAGAMASPAASSRPPPLAVPIDAPRVVAVPCFLA  
PAALLESHGITGQFSMSHQAVLATVTAQAQMQQLQAGYPSPSGLKNSVPHSMLPPMTPSP  
LQQRPLASTEAASSLETEQTPSYDQKSQSAFIVSKTSSDDGYNWRKYGQKQVKSTDRSR  
SYRCTNADCFAKKVERCPDGQVTEVIYRGQHSHEQPHKTKLSKERGHPSSGPFVTEG  
LDIPGIVTVESDPSTSKIDQNSSIDNPEQQLYCSSDCEGDGNSKAGEDPDDEPEPEPKRRLSL  
ITVTNPPPVFRTVKQPKVVMQTAVAGHVS DGYRWRKYGQKIVRGPNPNRSYRCTHDGC  
PVRKHVEKSSYDAKSMVITYEGKHNHDVPSLRYGLDPLPTALFIDSAPTAPAAETLNEHES  
KGDKIPSISNPPEIEKQLTGDKVLEFGDEKGLESAQALLSMSCDPSSGEEEGMKSQLFSEKS  
AAVPVQNS

>DoWRKY40

MLKKASITMKNQEDISTKNYLLPNFTNGFPGFRDSINTTMKKVMEGGNEEEKNGSSVG  
KKKGEKKAKRPRFAFQTRSQVDILDDGYRWRKYGQKAVKNNKFPRSYYRCTHEGCNVK  
KQVQRLSKDEGIVVTTYEGIHSHPTTEKNSDNFEQILSQMKIYTRS

>DoWRKY42

MGPVDLPMSLASPTMEADEDRRVNVNEMDFFSLEKSRTEETEAEYKTQNLNLEKEDLTMD  
TGLHLLSGDLSMGDGLVAAQETDEKKSEITAMKAKMGQMEEENQRLRNILAQMNO  
YSFLQMQFISMHKNKSTKGNTNLSNEELNKLEEGREGIVPKQFLEGRCEGTFNGDYC  
ALKSSFNGDQEEGKETVSILSSSSKSCEQAQEATMRKARVSVRVRSDAPMITDGCHWRK  
YGQKMAKGSTCPRAYRCTMAVGCPVRKQVQRCADDQITILITSYEGKHNHPLPPAAMS  
MASTTAAASMLLSGTIASSDSLMPNLLAQAVLPCPSGFATISASAPFPTVTLDLTQPPNP  
LQFQKPSSQLQFSIPAIGRPTAIPQIFGQSLQSEEQOSIADTVSAATAALTANPNFTAALAAAI  
TSIIGGGVGGSGGGAHQTGSAQCVNDDTPS

>DoWRKY43

MDPSPQLGCSTVNLDSLVSPTNFLIEAPICSRATNPIQIRRNPSREEAEDMMLKQVQKLS  
EENKLLNEKLSAMSVNYSNLQNLQLLDLMNSSPSEKGLTSSPTRKRKRSISQESDENSGFIPH  
VESMSSEDSYQRLRVDSKSSISKICVKTDPSDRITLVVKDGYQWRKYGQKVTRDNPSRA  
YFRCSFAPSPVKKKQSVDDLSILVATYEGEHNHRPPLQGETPSRASHGVSSTPNSAGQ  
TVTVDLTDWRWHVNSDKVSTETTSLEFQKVMIEQMAAALSKDPNFQTSANAIERILELP  
SSHN

>DoWRKY44

MSGDNKEFFHYESFFDHNYPPFSQHSGGGSGDPQGFEAPPLPYGGFTEYLQSSADYGMLS  
KAFDLSFSTKEEAFGVPALGKESEDAVIAGVSTNENSSVMAGVGVMSVTANSSPSSSSVEV  
AGEEDYGACEKDRKKNEEAGEEENGGEKDKNITKQKKKGEKRQREPRFAFMTKSEVDH  
LEDGYRWRKYGQKAVKNSNYPRSYRCTTQKCTVKKRVERSHQDPSIVITTYEGQHTHH  
CPANVRGSSHLLANQSSAMAMPFRAELFGRQLTQLGLANPSASSGYGFLQNLAAPSQQL  
QISNYGALLQDIMPSFVKSSSTEKKYLVNHSQKRNRRATIRKVPQLTTVRKASGSAPDDKCI  
VKNLNSSDALISVNLNIFPDKSDIGFLENLDMVGSMPISPIKVVVDSENAGGIIVGGTVPS  
SVNSPLALSSKNREGGNLILDRSTSDHNSNDGGGQDAIMVCESISLRPDVVFPLGTFDLPV  
EVRVLCNDLALNDVAMEVMPQVDEPDGTLHECNVSHGVVAVDPSSNMFYVAQGNFGDK  
LMNVGDNELCGVNMGVVNIYSSELNPSIFFVTLPLYLVLVSSVGLRVNEQLVDVPIALLY  
ANALYTHMGVRSKGC

>DoWRKY45

SLSMDASGSVGLDSKSFNLIGGPQSSEPSNLHSNPRRRCTGREDGSGKCASSGRCHCSKK  
RKLRLKRSIKVPAISNKLADIPPDEYSWRKYGQKPIKGSPPYRGYYKCSSMRGCPARKHVE  
RCLEDPSMLIVTYEGEHSYLSYAPSAGRTLEVLT

>DoWRKY47

MCDYFNRRMEKSQGDADIVRNRGLISPPESANELLGAANSWQFLPEPSAVFPRLDDKVF  
GGDSLADAADPLLHELARTSFFDSTEASGVQKKMLWEEGNRPNGSLLARMPQISLGKKG  
GSPVIGPPQLLAPGGGGPVEISSPRLIAGIKRRKSQAKKVVVICIPAPAAASGRPSGEVPSDL  
WAWRKYGQKPIKGSPPYRGYYRCSKSGSARKQVERSRDPNMLVITYTSEHNHPWPT  
QRNALAGSTRSHPSKTNNASSTSRSSLHNHKQFTDMKEEPKECSSNSSLHVKEEAHEE  
KEKALTDHGDHNDFDSVFEDESSFNEQMMSNLNQPDNFFADLAELDPDPMNIIFPKGFMG  
DKLEERDNNNNSKAMDPFIMFDWEGEKNIFGEAKRGL

>DoWRKY48

MEQYLEAGDLPLFPDHNYFSPSPLLPSDFHQEAALPPSALTPPLLLPNGISASLMEEREK  
LREEGEGNVNGVGERREKRKAVSGRGKKVSRPRFAFQTRSANDILDDGYRWRKYGQKA  
VKNSIHPRSYRCTHHTCNVKKQVQRLSKDTSIVVTTYEGVHNHPCEKLMEALSPLLKQI  
QFLTTRF

>DoWRKY49

MEINLLINALNQGNEQIRELEAQLDQPNSSEACKSLASQVQAALATAISMAKLLNQPAKAS  
ESPLLASESPRESENSEKVFKKRKTCTRLNTQVLLCSPSSAVNDGYSWRKYGQKVILGSKFH  
RAYYRCSHRDTLGCATKQVQRSDDSSLFQISLHGDHTCGNHHCRRIPELPELHNTSPG  
AERLMIVSGDLQPGFSLTSPSICGPNDISAPNLRGSGSEMAEMLSGASWTMSESPHENWD  
FKDDFDLWSSTTIESTMVEFGAEFPDFFS

>DoWRKY50

KSTAKIANKIRKPRFAFQTRSKVDVLDDGYRWRKYGQKAVKNNNFPRSYRCTHDKDCSV  
KKQVQRLSMDEEIVVTTYEGVHTHPVVKCTDNFENILNQMIY

>DoWRKY51

MVCQVLADGLSGDLWAWRKYGQKPIKGSPPYRGYYRCSSSKGCCLARKQVERSRTDQGM  
FVITYTGEHNHPLPHRNSLAGSTRQKFPSSAGGEGGGGNLPEPSTSAGEGSRVLSPTPLTS  
GTEEDLFRPRKKKKQEGSTDEDEEEEEAEVGEEDELDMLLVEDMELVGEDEFLLMGFEE  
LQVSSSPAVDELKVSSSPAVHELSSWDGEPQQTGTPPWPPAMAD

>DoWRKY52

MEAKEEPQLLLSPSTKKSRRSVQKRVSVPVMDADGGRSKGGGAGEAAPPSSSWAWR  
KYGQKPIKGSPPYRGYYRCSSSKGCPCARKQVERSMDPTTFIVTYSSDHDHWPAMSKNQ  
RHQQNSPAAATGAATLPESICSKPVDVENNPVSSDNLATDQDEKLTDLMVEESAGLMPD  
AFGWFAQVSSPSSNSPAAASDAEFFCNPIFGDDCDKLSGTAVDEEEDALFAGLGELPECS  
VVFRRGFLERQWRGGEDAKPCGIEAEESTAAAASWCGSTS

>DoWRKY53

MEAVKKRPLPAKEPRNEVDGGGEADQERFIKVS PARTGERSSTNTSSRPSSNSKDSPTISQE  
DQIQSTKAEIGEVEKEENERLKNLLSQIVKDYQSLQMHHFFDIVKQEQPNLVTKPTDELTAIKT  
HEAEETELVSLRLGNSVTTDHKKQLEEKLINTSSKSKENGHIEGLTLGLDCKFEGYTNK  
NNSECKEVASNPSSDNSIDEMKEEEAVEPCPPNKMKNLRTGDDEVLQQTHVKKARVSVR  
VRCQTPTMNDGCQWRKYGQKIAKGNPCPRAYRCTVAPACPVRKQVQRCADDMSILITT  
YEGNHNHPLPMSATAMASTTSAASMLMTGSSTTHSSGIPDAFPSSASPIITGVNSGLHNL  
NFSLSNTRTTPFYLPNTTISPSYSITLTLTAPPSSTAQTSQFNRFSSSSSSSSSFSISMSS  
WSSRSGYMSCAAHDQSYKPNYPHDSFYQSYMQNPTSMASMNQNFFTDIAKAITSDF  
QSALQAAITTYVGASGSQSGQVLHHAQSYAGNEYSTASGLFTTSVPSSSSAQQGNLMAMS  
SSKSTASAPVDHISWENMK

>DoWRKY54

MYAKEEPGTSPYLDPEPSPKKSRRSVQKRVSVPVMDADGGRSKGGGAGEAAPPSSSWAWR  
WRKYGQKPIKGSPPYRGGRGRRALRRTRRAARIFYFPARISGPSDTWRGGRET VWIGS  
SGGGVWKQRMSGGGGGHTIVPDFCFMFL

>DoWRKY55

MESCLVTSDMNMLINVLNQGNEHMRELQAQLDQPFSAEACKLLATKAKSALSSAISLAK  
LLEPSCQRPTGFVDSPPSASDSPKSDSSDKVFKELERREMCKKRKTLPRWSRQVRACSNS  
AMEGPLDDGYSWRKYGQKDILGAKFPRGYRCTYRHTHGCLATKQVQRSSSEDDFLFDV

TYRQVHTCNHCLQRTPTPSPKEENLIQNQASKPQAHPHQQQLLEQLKTGLRVKTEGFNFD  
EQLLESSPSFSFPSTPPNCIKPHNNLFSSASMPENQLMGNNSTTTSAESNYFSLSPCGVNNF  
AGGLNLQGFDEIAEIIISAAASTTNSPMLGMDFPMEQIEFETDFPFQFC

>DoWRKY57

MESMASSETTIIDEEQVQEQNIVVAFSNGLFVIPEDDYKWKKYGQKYIRSIQKNRCVKNK  
CKTRKKVEWPLNEPNNIDIAYEGDHNYRALVGHSENEEAGIAANQYDLATQMFGYART

>DoWRKY59

MNIHILAE LRRLREQIGGNQIAHASAETKNNIYRAISGEVQGIDDEKVPVAVPKDEYQW  
NKY GQKLIK RIGNKHRCKKKDCGAKKKVEWAPSNPSTV RVLYEGNHNHQCARIDSDEVD  
EDAMIQANQYDLATQIFGRN

>DoWRKY60

MSEEQKGGDDDQIPTITIPQDEYEWTKY GQKLIK GIGNKYRSYFRCKKKDCGAKKKVEW  
APSNPSDVRVLYEGSHNHQPARITGSDQVDEAAMIQVNQYDLATQIFGRN

>DoWRKY62

MVERS LDGHTEI IYKGTHSHPKPQRIRKNSSSFEGFQGSTHHEGKDHSFNGQFGSITTENS  
SAYYGDAHDINMNSQRMRAVGPDYDDDEADAKKWKMEGEVEGISISSDRTVREP KVMV  
QTTSDIDVLDG YRWRKYGQKVVKGNPNPRSYYKCTTLGCSVRKHIERASTDLRAVITTY  
EGKHNHDVPAPRGSGLTNKTSFDDNNNIRTNNSSSSSYNMSNFTMAVRPSVASNSFFSP  
RTNGMDGIGFFRYENSMNSLFANELQKQNLQHLQKQGESVLSKAKKEPRDDLFTDSSL  
G

>DoWRKY63

MTPSSSSFVTSENSVPILPFSTSSSSQLNTFLRASEAVGEERSTFRSSNGFKSTVTTSSLFPNA  
SSSFSPPPFLSLPGGLSPAVFLNSPIPLSSNAQILASEAIGSTFPTQTITWTGNNTNYLHELKE  
DRYHNKSYNSFSFETSTRPASLKSSSFHPSSIGFMASEEEAFEANQQSWSYQQPLITSND  
QIPNLQASSQSEYNYNYSNISAQSLREQRRLDDGYNWRKYGQKKVKG TENPRSYYKCTY  
PNCPTKKKVERS LDGHTEI IYKGTHSHPKSRIRKNSSSFEGFQGSTHHEGKDHSFNGQFG  
SITTENS SAYYGDAHDINMNSQRMRAVGPDYDDDEADA

KKW

>DoWRKY64

MAQKT VVIVRGEAKLGKHGGEAPPDDWSWRKYGQKPIKDS PYPRAYYRCSSSKGCSAK  
KQVERCKKDESLVIISY TSSHNHPGPVPSSLNKSINSSRIPFLNEDCRSSEKNRNVEDNYESS  
IVKCAQESTEKVQGE GDTISSSLIEPVNCSMEDDDIFDELDELPLPSSFNSLMKMVYCSLAI  
NEADLVVEKIVWHSVR

>DoWRKY65

MASSEAEGLP PAMALVIDELTKGRQSVATLTLFVDPLELQTAKL LLEETMSTISKAIAIL  
ECVNSQQDHTAVQLESPSSAVTSKGPVGKRKI QSTRKAASRKRGNPYSWKRVTSATIEDG  
HTWRKYGQKEIFSAKHPRSYFRCTYKYDQGCKATRQVQKSEEDPFLYVITYFGEHTCEAA  
KENNPRCREPCVVSFESNKINEIKQEIAFSSFP SHKQENEEEVVSNLTSVDSRSNCLEQPAM  
ELHKSSITGLEPGWSDSSSGLNYSINSYDVEFMDLEDILSFELNEFFAW

>DoWRKY66

MAEHPFSQSSTVIDHL SRGYERLTQLLALISSSPANPSTTAPAMVLVDKAMCCIAAALSELQ  
TSSPRSVDSPTAAEDHRNGTDSKKRCKKNVQSWTIVTSVPHFDGHQWRKYGQKRIHSSEF  
PRSYYKCTH SKDKGCKATKIQQKEDKISNPPKYVVSYSVHHTCKAIETHEIPIVMDSLA  
ITNEHSTSSSQAASPD LSSPVL PKPVADIEQVSTIMDYTEPDHGEANWFEGSGLLSPFADSDI

DWERLMS

>DoWRKY67

MSYSSNLP LHAWPPPLVGLGDTMKVGGDVAVSLPQTPAVKRRKNQARKVVCIPAPAVASN  
KPGGEVVPSDLWAWRKYGQKPIKGSYPRAEAIELGGTGTEVKEKKIDKCFVNQSRALLS  
FYTEQFLASPSLSISLCAFDLLHYGRRPDICIKSRNLEGRANFKKKGYRCSSSKGC SARK  
QVERSRTDPNMLVITYTSDHNHPWPTQRNALAGSTRSQSSKNNNNNASSSSKSSSINQKLPS  
ESITVREEEEEEEAKLISPISSEFPFVKERKDMENSTVVEHLHDFNQVFFQKSLKELEPDD  
FFADLAVLDADSM SLDEEKNDKKTMDPFNMFGWDGGNSFGVTKRG

>DoWRKY68

MAALLEFIDQFTNFSSHFPEFYSDGQPELDVYDYAEAEDAHLFDESCLTFTGETEAVVAA  
ATVVSTGKDGGEQRNGQENDEVKRRKVEAEFRIGFRKSEVEILDDGFKWRKYGKKAVK  
NSPNPRNLQSSANSRCFPKICKSSGVFRRQEELRRWSRRGRKVNFFLTMLELNIFNPWWIP  
RAKDLLQRRLSIIS

>DoWRKY69

MENKGGGGLTLEPNPFRAIKRRQSMDSAAGFEFPISLACREAAPSSHDDQKPAGEMDFSS  
EKKARVSTPVGIPLDLMIKKEDLTINTGLHLANTGSDQSTLDEGMSLNEEEEKEGKTELAM  
QSELGRMTEENQRLRGMLSQVTNNYNALHMHFMALMQQRNQNNKSNNITQSQEAVSD  
DQLRKQENVGVAIVPRQFIDLGLAAGDADEPSTHSSTDGGSQDPSSQS QANKEKSANSKE  
MMVFEREGNGFVREESPENSSHVWAPNNQPKVGGVGLKPAEQAEATMRKARVSVRAR  
SEAPMIADGCQWRKYGQKMAKGNPCPRAYRCTMATGCPVRKQVQRCAEDRSILITTYE  
GNHNHPLPPPAMAMASTTSAASMLLSGSMPSNDGLMNSNVLARTILPCSSSMATISASA  
PFPTVTLDLTQSPTPLQYQQRPPPPQFHLPTQPAQPSSLPHIFGQAIYNQSKFSGLQMSAE  
VARPPPHNLADTVSAATAAITADPNFTAALAAAITSIIGGTHQAGSSSNSGAVNN

>DoWRKY70

MDEILNQVLQACRLSRELESSLPHIANNPNVLLASCEQVSLAFNKVVYDLRGCLGGSSSSF  
DPTGQLIIGERIMEDWSHLHDPDSMPTGQMAFSQFGLDIQVTGAAIAAVEFADVGGGGRL  
AGGEQEHAVVVVSEAETGHGGRLGGPVGSTGQRPSRRRRDSGDTRTVRIPALRTGNLELP  
PDDGYTWRKYGQKAILGSKFPRSFRCTHRNFYGCKAKRKYVQLDADPNTYEITYCGNH  
TCQTSPTPLILPSMTPTTNE SMSGNVAIMTGASPPPAFPLSTSIELSSWFLKEHESEGKAPSR  
PFLSSHEVGESSRAHAGPSEQAAPPVRTGREGEGSVADLADAMFNSGSSSNSMDTIFTFKT  
D

>DoWRKY72

MALKAGSLLVPYAQSISLLIKLIRMEDMLDESVAKWLESLEEEFNMQDVLFHTEQVPLMA  
PQRATEPKSEVRS AELVNLLISKVYSGPTIGDIESALSLSCSDDGGRNYSALQEKGSSTK  
MDKYTLRLKTC DNGVADDGYKWRKYGQKLIKNSPNPRSYRCTNPRCNAKKQVERSTE  
DPETVIVTYEGLHLHFTYSHILLSQKNDQHAASLNALKKQKKQTELQPKESGQQHMQQI  
AQSIQNREQPQGNKHLRDGESYQEFLEDILLENPSMREKNIHGLLTDVQRQPQGMLEDVV  
PLMVRKPCSSATPSNEPSYFSQESSPSHYSSLFISPPSSQIDKGILSSIL

>DoWRKY73

MEPATCLGFSTLNLELSVGPADLTEKGLASKTPPDRQQESMFMKEKLSKIMEDNRKLNEM  
LSDMSTNYCSLQNKFFDFMNSSPSEKAAGMASPPTGKRKSDSLESYSHENVNNGVKAHV  
ESLPIEFDSCKRLRMDSKSSVSKICVRADPSETSLVVKDGYHWRKYGQKVTRDNPSPRAY  
FRCSFAPSCPVKKKVQRSANDLSILVATYEGEHNNHKAQLQSEGSGRLSHVGS SITPSLSINSS  
SPTIMVDLTNDKHLAEAKKACGEMASTEIQKFMIEQMAAAIAKDPTFRATLANVISGRIF

>DoWRKY74

MAVDLIGYAKMDDQITIQEAAAAGIRSMENLIFQLNRHHQKSTSSSATAATIDCREIADHT  
VSKFKKMISILNRTGHARFRRGPPSPILPAVKPTPQVAVLPSAPAMAVPVVPLQSLTLDFTK  
PSSVGGGSSDLAIVAASSGKYIKETFSISTPISSANSSFMSSITGDGSVSNRPGGTTSLLLPP  
APAISAGGVVSGKPPLAAYKKRCHSHAHSEDFAGKFAANGGRCHCSKRRKNRVKRTIRVP  
AISSKMADIPPDEYSWRKYGQKPIKGSPIYPRGYKCSSLRGCPARKHVERAP  
DDPSMLIVTYEGEHRHSQPSDALVFDTHREI

>DoWRKY75

MEETPYNHSSAIDNLSQGFELTQLRALFLASSPAKPTDKTLAIGLLDKALRCITAALSDL  
QPISPTVAVEDRKNDDHKRKRQVSWTIMTSVPHFDGHQWRKYGQKRIHNSDFPRSY  
KCTHNKDQGCQATKTIQKEDKVPNSPIYKVSYCMHHTCKPIETQENPFVMDSSAIMNST  
SSTTASSSYSSHELSSISFQAPSSDQPTVFPQLLEESTEQVFPMESMLLSSETRGDLAVLGLD  
WEWQDELITLGEFGDLIVRI

>DoWRKY76

MKINDKEEEEAKEKNIAEERNRMTIQEDDYKWRKYATNYIHKIKKFRSYLRCVKNKNCK  
ARKKMDWPLNDPNNIDISCEGHSHRCMESMASSETTIIIEEQQEONIALAFNNALVVIP  
KDDYKWDKHGQKFIISIQKNRSYFRCANRNCKARKKVDWPRNESDNLYISYEGDHNHKV  
VAVGHSENEESGIAAN

>DoWRKY77

MGSNNGSSICLDLSIGTLQFSNSCMKQHNKINKLPLIHGSTKMEEQEIYSSQIEAEMLD  
NRVVAENRRLSKMLAAISERHRALRAQVLEMINSTSSSSSTKPAPKRRNCDGSLGYPQSVN  
ASYKVNCAKEEVRETRPRISRMIRSDGLVVRDGYHWRKYGQKVIRDNPYPRAYFRCSF  
APVCPVKKKQVQRCTEDHSVLVVTYEGEHNHVQPLPGDSLNCRL

>DoWRKY78

MGSQDEEILSPPIWKSAAAMKELARGLDSVAKLASLLQVGSSKNGRPEAATAGLLAEIMC  
RISKAMAALES GGNISSCVTGNKEGVGGKSKMQSTRKAGYRRSRGSPYSWTRITSNTID  
DGHTWRKYGQKDIFSAKYPRSYFRCTHKFDQGCKASKQVQRSEDDPSLYVITYFGEHTC  
VDAKKATITPSRELCHIFESSNGENIKQETLTSFPLNQESEEVLNLTADSASDYFVSPK  
VDIKKSEEQTAAELGQEHNGPLALYTSMLNMGMEFMDYEEFLNFDHDLFQN

>DoWRKY79

MAALLEPAEMNSHFSSLQPAKLLHSSCEGSLAATGGGGSGDVFYFAQIDQSQFFDGSCLT  
EVAGELETPTSRMIESSDLYEHMEYEELKRRKAEGGCRIGFRTKSEVEILDDGFKWRKYG  
KKAUKNSPNRNYRCSSPGCEVKKRVERDRSDSSYVITIYEGTHNHISPDCKPYTTNPPQ  
LAIAPSHSWNQF

>DoWRKY80

MQDKNKNSSANLRKSPEQLAGSSASPSIIEIAFKPKAVRLKPVANLSSEIAFKCDGSVQA  
ASMALDMESIDISKENSKTIILYRPIAQENHEEHKQSLLDVHFQPQELNQVNCQSSTMSLH  
QSLTSSSNANNFLCSSNSSHESKTKVKSQQITKNGDRNSLDGYNWRKYGQKQVKGSEY  
PRGYRCTHPFCPVKMMVERS KDGEISEIVYRGDHNHPKSQKKEQISSRLREQTSVLDG  
NGGNFMDRAVTDLFLEENLFENKTENCDVEDFLDTGINRKALYSDSDTVLHALSLSFG  
ADLNGGKAAAFSTRDGYEKKSQKRYLFY

>DoWRKY81

MAAQALNDQKGVEDGYNWRKYGQKQVKGSENPRSYKCTYPNCPSKKKVEKTLEGQI  
TEIYKGGKSHAKPKPTRRNSYFGSDQTFNLNSQVLD SITNAENSSASYGDDDFDMNSMM

TKSQDGFDEDEPDWKKM

Supplementary Table 1 Primers used for qRT-PCR.

| Primer name | Primer sequence                | Primer name | Primer sequence                |
|-------------|--------------------------------|-------------|--------------------------------|
| DoWRKY1F    | 5'-CCGTTTCGAGGATTTGGAGATAG-3'  | DoWRKY45R   | 5'-CGTGGATTCGAGTGCAGATT-3'     |
| DoWRKY1R    | 5'-GAGGAGGCGATATAGGAAGAGA-3'   | DoWRKY47F   | 5'-CCAATCAAAGGGTCTCCTTACC-3'   |
| DoWRKY2F    | 5'-TCCATGTCCGAGAGCTTATTTTC-3'  | DoWRKY47R   | 5'-TAGGATCTGTCCGGCTTCTT-3'     |
| DoWRKY2R    | 5'-CACTGATCATCGGCACTTCT-3'     | DoWRKY48F   | 5'-TTCAGACGAGGAGTGCTAATG-3'    |
| DoWRKY3F    | 5'-TCTCCTTACTTCTCTTTCCCTTTG-3' | DoWRKY48R   | 5'-GTGATGTGTGCAACGGTAATAG-3'   |
| DoWRKY3R    | 5'-CCCTCGTAGTTCTCTGGATTTG-3'   | DoWRKY49F   | 5'-CGACGACGATTCTTCTCTCTTC-3'   |
| DoWRKY4F    | 5'-CAGACATCCACATACGATTCA-3'    | DoWRKY49R   | 5'-CCCGGCGAAGTATTGTGTAA-3'     |
| DoWRKY4R    | 5'-GTCGGTAGAGGAAGCAAACA-3'     | DoWRKY50F   | 5'-TGGCTATCGTTGGCGTAAATA-3'    |
| DoWRKY5F    | 5'-AGCACTGGTGAAACAGAGTTAG-3'   | DoWRKY50R   | 5'-GCAATCCTTATGTGTGCATCTG-3'   |
| DoWRKY5R    | 5'-TGGATTTCTTCGGCTCGTTATC-3'   | DoWRKY51F   | 5'-GGAGAAGGAAGTGTTCGTCTTT-3'   |
| DoWRKY6F    | 5'-GAACTGTAAGGCGAGGAAGAAG-3'   | DoWRKY51R   | 5'-GCTACCTTCTGCTTCTTCTTC-3'    |
| DoWRKY6R    | 5'-TTGCTAAGGCTCTGTGGTTATG-3'   | DoWRKY52F   | 5'-GGACGTGGAGAATAATCCTGTATC-3' |
| DoWRKY7F    | 5'-TTACCATTCCTCCGGGTTTAAG-3'   | DoWRKY52R   | 5'-CATAAGCCCTGCCGATTCTT-3'     |
| DoWRKY7R    | 5'-ATGCAGTCCATCTTGTGAGTAG-3'   | DoWRKY53F   | 5'-GAAGTTGATGGAGGAGGAGAAG-3'   |
| DoWRKY9F    | 5'-GTGATGGTATGGTGGGTCTATC-3'   | DoWRKY53R   | 5'-CCTGGATGAAGTGTGGTAGAT-3'    |
| DoWRKY9R    | 5'-TGCTTCTTCATCCTCCAGTTC-3'    | DoWRKY54F   | 5'-TGGGCAGAAGCCGATAAAG-3'      |
| DoWRKY10F   | 5'-AGAGCCATGACTGCTAATTCC-3'    | DoWRKY54R   | 5'-GGAGGAGTAGGTGACAATGAAC-3'   |
| DoWRKY10R   | 5'-CTGCTCCTTCTCCTCATTCTTC-3'   | DoWRKY55F   | 5'-GGCCACTTGATGACGGATATAG-3'   |
| DoWRKY12F   | 5'-CGGTGAGGATGAAGTTGATAGG-3'   | DoWRKY55R   | 5'-GCGGTATGTGCATCTGTAGTAG-3'   |
| DoWRKY12R   | 5'-CCCTTCGTTCTCTCCTTCTTTC-3'   | DoWRKY57F   | 5'-AGAACTGTAAGACGAGGAAGAAAG-3' |
| DoWRKY14F   | 5'-ATGACCAGGCGAAGAAGATG-3'     | DoWRKY57R   | 5'-CCAACCTAAGGCTCGGTAGTTATG-3' |
| DoWRKY14R   | 5'-CTCTTCGTCAGAAACGCAAATC-3'   | DoWRKY59F   | 5'-CCGTCAGGGTGTATATGAAGG-3'    |
| DoWRKY15F   | 5'-ACAGAGCCGAGGATCATAGT-3'     | DoWRKY59R   | 5'-TCATACTGGTTTGCTTGGATCA-3'   |
| DoWRKY15R   | 5'-CCTTGGATGAGGGTTTCCTTTA-3'   | DoWRKY60F   | 5'-AGGAACAGAAAGGTGGAGATG-3'    |
| DoWRKY18F   | 5'-GCTACGCAAAGATGGAGGATAA-3'   | DoWRKY60R   | 5'-CCGTAAGTATGACTCCTCGTATTC-3' |
| DoWRKY18R   | 5'-GTGGCGGTTGAGATGAAAGA-3'     | DoWRKY62F   | 5'-GTGGAGAAAGTATGGGCAGAAG-3'   |
| DoWRKY20F   | 5'-TGAAATGGAGGATCAGAATGG-3'    | DoWRKY62R   | 5'-GTTGTAATCACCGCTCGTAAGT-3'   |
| DoWRKY20R   | 5'-TCATATCGAGAGCCGCTTATTG-3'   | DoWRKY63F   | 5'-GAGCTATCAGCAACCACCTTTA-3'   |
| DoWRKY23F   | 5'-GAATAGGGTTGAGAGGAGCATAG-3'  | DoWRKY63R   | 5'-CAGGCTTTGAGCCGAGATATT-3'    |
| DoWRKY23R   | 5'-AATTTCCATGGCGGCAATAAG-3'    | DoWRKY64F   | 5'-GCTCAGAAGACGGTGGTTATAG-3'   |
| DoWRKY24F   | 5'-CTCGATCGAAGGCTGTAATGT-3'    | DoWRKY64R   | 5'-GTACTTCTCCATGACCAGTAATC-3'  |
| DoWRKY24R   | 5'-CTGGTTGAGAGGATGGTGATTAT-3'  | DoWRKY65F   | 5'-GAAGCTGCGAAAGAGAACAATC-3'   |
| DoWRKY25F   | 5'-TCACGAACATGAAGGCAGAG-3'     | DoWRKY65R   | 5'-CTTGTGAGATGGGAAGGAAGAG-3'   |
| DoWRKY25R   | 5'-GAATCCTTTGGAGAACCGAGAG-3'   | DoWRKY66F   | 5'-GCACTCACAGCAAAGACAAAG-3'    |
| DoWRKY26F   | 5'-GGGTTTAGATGGAGGAAGTATGG-3'  | DoWRKY66R   | 5'-GACCACGTACTTTGGAGGATTAT-3'  |
| DoWRKY26R   | 5'-GAGCTGAGAGCACCTGTAATAG-3'   | DoWRKY67F   | 5'-TGGCTTCTCCTAGCTCTCTATC-3'   |
| DoWRKY27F   | 5'-AGCTACTACCGTTGCACAAATA-3'   | DoWRKY67R   | 5'-CCTTCTTCTAAGTTCCTGCTC-3'    |
| DoWRKY27R   | 5'-GGCCTTCATAGGTTGTGATGA-3'    | DoWRKY68F   | 5'-GGAAGGTAGAGGCTGAGTTTAAG-3'  |

|           |                                |           |                               |
|-----------|--------------------------------|-----------|-------------------------------|
| DoWRKY28F | 5'-AGCAAACATCATCTCAGCCTTTA-3'  | DoWRKY68R | 5'-TCTTTACAGCCTTCTTCCCATAC-3' |
| DoWRKY28R | 5'-GCCGCCATTCTCCTCTATTT-3'     | DoWRKY69F | 5'-CCACATAACCTTGCCGATACA-3'   |
| DoWRKY30F | 5'-GTACGGGAAGAAGTCAGTCAAG-3'   | DoWRKY69R | 5'-GATGCGTTCCGCCGATAATA-3'    |
| DoWRKY30R | 5'-CGGGTCTTCGTTGTCTCTTT-3'     | DoWRKY70F | 5'-GGCGAGAGAATAATGGAGGATTG-3' |
| DoWRKY31F | 5'-GGGAGATCACGATCATGCTAAG-3'   | DoWRKY70R | 5'-CAGCACCCGTTACCTGAATATC-3'  |
| DoWRKY31R | 5'-CCCTCCTTCCCAATCAAACA-3'     | DoWRKY72F | 5'-ACAAGGGATGCTGGAAGATG-3'    |
| DoWRKY32F | 5'-GGCTGTGAGTTTCTTGTAGT-3'     | DoWRKY72R | 5'-TGAGATGAAGAGGGAGGAGTAG-3'  |
| DoWRKY32R | 5'-GTGGTTGTGAGAGCCCTTATAG-3'   | DoWRKY73F | 5'-CACTCCCTCGCTATCCATAAAC-3'  |
| DoWRKY33F | 5'-TGGCTTCTCCTAGCTCTCTATC-3'   | DoWRKY73R | 5'-CGCCATCTGCTCAATCATAAAC-3'  |
| DoWRKY33R | 5'-CCTTCCTTCTAAGTTCCTGCTC-3'   | DoWRKY74F | 5'-GGACGATCAGATCACGATTGAG-3'  |
| DoWRKY35F | 5'-GGAGGAAGAAGAGGAGGAAGAA-3'   | DoWRKY74R | 5'-GCAGACGATGAGGTGGATTT-3'    |
| DoWRKY35R | 5'-GCAACTTCTCCAAGCCATAA-3'-3'  | DoWRKY75F | 5'-CATACTGCAAGCCATAGAG-3'     |
| DoWRKY37F | 5'-GTTGCTAGTGCCTCTCATTCT-3'    | DoWRKY75R | 5'-GCTGTAGGAAGAAGAAGCAGTAG-3' |
| DoWRKY37R | 5'-CACTGTTTCTGCCCCGATTTTC-3'   | DoWRKY76F | 5'-GAACTGTAAGGCGAGGAAGAAG-3'  |
| DoWRKY39F | 5'-GACAAACCCACCTCCAGTTT-3'     | DoWRKY76R | 5'-GTGGTTTCTGAAGAGGCCATAG-3'  |
| DoWRKY39R | 5'-GCCACCTGTATCCATCACTTAC-3'   | DoWRKY77F | 5'-CTGATGGATTGGTTGTGAGAGA-3'  |
| DoWRKY40F | 5'-CGATAACGATGAACAAGCAAGAAG-3' | DoWRKY77R | 5'-CTGGAGCAAAGGAGCATCTAA-3'   |
| DoWRKY40R | 5'-CTGAACCCTGGGAATCCATTAG-3'   | DoWRKY78F | 5'-CCAGAGAGCTCTGCATCATTAG-3'  |
| DoWRKY42F | 5'-ACTGGACTGCACCTTCTTTC-3'     | DoWRKY78R | 5'-TCTTCCTCGCTTTCTTGATTGA-3'  |
| DoWRKY42R | 5'-TTGCTGTTATCTCGCTCTTCTT-3'   | DoWRKY79F | 5'-AAGAGAGTGGAGAGAGATCGTAG-3' |
| DoWRKY43F | 5'-TGGACCAACCAACTTCCTTATC-3'   | DoWRKY79R | 5'-CTTGGAGCTATGGCTAGTTGAG-3'  |
| DoWRKY43R | 5'-TGGACCAACCAACTTCCTTATC-3'   | DoWRKY80F | 5'-TTTCCACCAGGGATGGTTATG-3'   |
| DoWRKY44F | 5'-CCAGTTGAGGTTAGGGTTCTTT-3'   | DoWRKY80R | 5'-CAGCCACTACTTTAGGTGTTGA-3'  |
| DoWRKY44R | 5'-TTCATGCAGGGTTCCATCAG-3'     | DoWRKY81F | 5'-GGCAGCTCAAGCCCTAAAT-3'     |
| DoWRKY45F | 5'-GTGGGAGTGTTCAGGGTTAG-3'     | DoWRKY81R | 5'-CACTCCCTTTCCTTCTTCT-3'     |

Primer pairs for qRT-PCR were designed by online Primerquest software (<http://www.idtdna.com/Primerquest/Home/Index>).

Supplementary Table 2 The fold change of *DoWRKY* genes under cold stress in *D. officinale* root was calculated from the  $2^{-\Delta\Delta CT}$  value.

| Gene name | 2 h         |            | 6 h         |            | 12 h        |            |
|-----------|-------------|------------|-------------|------------|-------------|------------|
|           | fold-change | regulation | fold-change | regulation | fold-change | regulation |
| DoWRKY1   | 2.265331    | up         | 2.233163    | up         | 4.533601    | up         |
| DoWRKY2   | 1.990573    | up         | 3.328046    | up         | 1.935483    | up         |
| DoWRKY3   | 0.979795    |            | 0.239189    | down       | 0.542564    | down       |
| DoWRKY4   | 1.970462    | up         | 1.91479     | up         | 1.024765    |            |
| DoWRKY5   | 0.481705    | down       | 0.240917    | down       | 0.249185    | down       |
| DoWRKY6   | 2.330698    | up         | 0.58959     | down       | 0.567205    | down       |
| DoWRKY7   | 1.417782    |            | 1.329188    |            | 1.882226    | up         |
| DoWRKY9   | 1.039162    |            | 1.007853    |            | 1.038145    |            |
| DoWRKY10  | 1.853142    | up         | 0.970247    |            | 1.958816    | up         |
| DoWRKY12  | 0.978066    |            | 0.945284    |            | 1.90043     | up         |
| DoWRKY14  | 0.977318    |            | 0.971165    |            | 1.909692    | up         |
| DoWRKY15  | 0.959762    |            | 0.956212    |            | 0.997179    |            |
| DoWRKY19  | 1.831244    | up         | 0.972421    |            | 1.045971    |            |
| DoWRKY20  | 0.955991    |            | 1.911853    | up         | 3.150004    | up         |
| DoWRKY23  | 0.99987     |            | 1.750872    | up         | 1.002972    |            |
| DoWRKY24  | 1.082131    |            | 1.197936    |            | 1.02526     |            |
| DoWRKY25  | 1.009331    |            | 0.980022    |            | 0.965477    |            |
| DoWRKY26  | 1.036478    |            | 1.018927    |            | 0.508697    | down       |
| DoWRKY27  | 0.988178    |            | 0.967737    |            | 1.02529     |            |
| DoWRKY28  | 4.333651    | up         | 4.066062    | up         | 4.132963    | up         |
| DoWRKY30  | 1.059679    |            | 1.000311    |            | 1.030325    |            |
| DoWRKY31  | 0.941963    |            | 0.968469    |            | 0.498762    | down       |
| DoWRKY32  | 0.946468    |            | 0.934729    |            | 1.810887    | up         |
| DoWRKY33  | 0.516479    | down       | 1.044661    |            | 0.139306    | down       |
| DoWRKY35  | 0.990622    |            | 0.937629    |            | 0.935037    |            |
| DoWRKY37  | 0.964434    |            | 1.906962    | up         | 1.957952    | up         |
| DoWRKY39  | 1.838454    | up         | 1.644565    | up         | 1.733134    | up         |
| DoWRKY40  | 0.482648    | down       | 0.763109    |            | 0.925449    |            |
| DoWRKY42  | 0.922696    |            | 0.94964     |            | 0.428906    | down       |
| DoWRKY43  | 1.047766    |            | 1.042897    |            | 1.139457    |            |
| DoWRKY44  | 1.071638    |            | 1.041361    |            | 0.55732     | down       |
| DoWRKY45  | 0.985298    |            | 0.970262    |            | 1.985393    | up         |
| DoWRKY47  | 0.977998    |            | 1.012522    |            | 1.01356     |            |
| DoWRKY48  | 1.021827    |            | 0.978902    |            | 0.498674    | down       |
| DoWRKY49  | 0.971073    |            | 0.959472    |            | 0.923272    |            |
| DoWRKY50  | 0.797415    |            | 0.617126    | down       | 0.138434    | down       |
| DoWRKY51  | 0.939788    |            | 0.99726     |            | 2.092202    | up         |
| DoWRKY52  | 0.490264    | down       | 0.972072    |            | 1.004103    |            |
| DoWRKY53  | 0.724382    |            | 0.204241    | down       | 0.190358    | down       |

|          |          |      |          |      |          |      |
|----------|----------|------|----------|------|----------|------|
| DoWRKY54 | 0.958466 |      | 0.983483 |      | 0.970596 |      |
| DoWRKY55 | 1.006814 |      | 0.480759 | down | 0.485327 | down |
| DoWRKY57 | 0.685186 |      | 0.364109 | down | 0.350887 | down |
| DoWRKY59 | 0.976442 |      | 1.276076 |      | 1.798678 | up   |
| DoWRKY60 | 1.029446 |      | 0.943787 |      | 1.034011 |      |
| DoWRKY62 | 0.423143 | down | 0.403636 | down | 0.558543 | down |
| DoWRKY63 | 1.013416 |      | 0.995385 |      | 0.526386 | down |
| DoWRKY64 | 0.21684  | down | 2.015148 | up   | 7.034233 | up   |
| DoWRKY65 | 4.020655 | up   | 3.912917 | up   | 7.969208 | up   |
| DoWRKY66 | 6.132598 | up   | 1.174955 |      | 9.37194  | up   |
| DoWRKY67 | 2.434081 | up   | 1.717512 | up   | 1.83204  | up   |
| DoWRKY68 | 2.371172 | up   | 0.908109 |      | 0.936863 |      |
| DoWRKY69 | 1.269489 |      | 1.241931 |      | 2.114103 | up   |
| DoWRKY70 | 0.824168 |      | 1.066812 |      | 1.417243 |      |
| DoWRKY72 | 0.827595 |      | 1.222205 |      | 0.854065 |      |
| DoWRKY73 | 0.836346 |      | 0.717944 |      | 0.293085 | down |
| DoWRKY74 | 1.352469 |      | 0.844445 |      | 1.30155  |      |
| DoWRKY75 | 0.876421 |      | 0.899544 |      | 1.036603 |      |
| DoWRKY76 | 0.802102 |      | 1.011095 |      | 0.949802 |      |
| DoWRKY77 | 0.981828 |      | 1.073242 |      | 0.455477 | down |
| DoWRKY78 | 0.932631 |      | 0.901152 |      | 0.48763  | down |
| DoWRKY79 | 0.856348 |      | 0.626862 | down | 0.862714 |      |
| DoWRKY80 | 0.821365 |      | 0.936888 |      | 1.063025 |      |
| DoWRKY81 | 1.257885 |      | 1.101006 |      | 1.026375 |      |

Supplementary Table 3 The fold change of *DoWRKY* genes under cold stress in *D. officinale* stem was calculated from the  $2^{-\Delta\Delta CT}$  value.

| Gene name | 2 h         |            | 6 h         |            | 12 h        |            |
|-----------|-------------|------------|-------------|------------|-------------|------------|
|           | fold-change | regulation | fold-change | regulation | fold-change | regulation |
| DoWRKY1   | 1.978559    | up         | 3.729832    | up         | 3.727629    | up         |
| DoWRKY2   | 0.963284    |            | 0.958807    |            | 1.047581    |            |
| DoWRKY3   | 0.991002    |            | 0.840987    |            | 0.46765     | down       |
| DoWRKY4   | 0.515842    | down       | 0.955601    |            | 0.961018    |            |
| DoWRKY5   | 0.989789    |            | 0.95229     |            | 0.489741    | down       |
| DoWRKY6   | 0.236484    | down       | 0.311696    | down       | 0.309769    | down       |
| DoWRKY7   | 0.499287    | down       | 0.48959     | down       | 0.497626    | down       |
| DoWRKY9   | 0.992045    |            | 0.942133    |            | 1.862031    | up         |
| DoWRKY10  | 0.505012    | down       | 0.952971    |            | 0.980039    |            |
| DoWRKY12  | 1.029331    |            | 1.967985    | up         | 1.963988    | up         |
| DoWRKY14  | 2.008905    | up         | 1.978572    | up         | 24.44417    | up         |
| DoWRKY15  | 0.982387    |            | 0.930468    |            | 0.919128    |            |
| DoWRKY19  | 1.020963    |            | 0.965149    |            | 0.978174    |            |
| DoWRKY20  | 0.996216    |            | 1.88666     | up         | 1.768084    | up         |
| DoWRKY23  | 0.996287    |            | 1.119472    |            | 0.918883    |            |
| DoWRKY24  | 0.990862    |            | 0.957165    |            | 0.496485    | down       |
| DoWRKY25  | 1.015875    |            | 0.963873    |            | 0.975797    |            |
| DoWRKY26  | 1.933615    | up         | 1.904293    | up         | 0.902092    |            |
| DoWRKY27  | 0.498225    | down       | 0.497844    | down       | 0.479401    | down       |
| DoWRKY28  | 0.967644    |            | 1.928342    | up         | 0.899999    |            |
| DoWRKY30  | 1.041043    |            | 0.965867    |            | 1.013071    |            |
| DoWRKY31  | 0.525282    | down       | 0.764878    |            | 0.550235    | down       |
| DoWRKY32  | 1.064793    |            | 0.92683     |            | 0.932116    |            |
| DoWRKY33  | 0.736695    |            | 0.429154    | down       | 0.293776    | down       |
| DoWRKY35  | 1.828691    | up         | 1.840009    | up         | 0.927246    |            |
| DoWRKY37  | 1.986425    | up         | 1.968947    | up         | 1.967264    | up         |
| DoWRKY39  | 1.017543    |            | 1.895791    | up         | 1.894909    | up         |
| DoWRKY40  | 7.281612    | up         | 11.0311     | up         | 8.700599    | up         |
| DoWRKY42  | 3.995743    | up         | 7.549858    | up         | 7.064994    | up         |
| DoWRKY43  | 0.968988    |            | 1.158438    |            | 0.903429    |            |
| DoWRKY44  | 1.119839    |            | 1.139866    |            | 1.146968    |            |
| DoWRKY45  | 0.955679    |            | 0.926367    |            | 0.922151    |            |
| DoWRKY47  | 1.000923    |            | 0.977318    |            | 0.474632    | down       |
| DoWRKY48  | 0.987014    |            | 1.003871    |            | 0.463522    | down       |
| DoWRKY49  | 1.401035    |            | 1.645145    | up         | 1.759266    | up         |
| DoWRKY50  | 0.577533    | down       | 0.779937    |            | 0.757141    |            |
| DoWRKY51  | 1.068151    |            | 1.010333    |            | 1.010333    |            |
| DoWRKY52  | 0.511558    | down       | 0.956512    |            | 0.974353    |            |
| DoWRKY53  | 0.31456     | down       | 0.301076    | down       | 0.174807    | down       |

|          |          |      |          |      |          |      |
|----------|----------|------|----------|------|----------|------|
| DoWRKY54 | 1.00862  |      | 0.482553 | down | 0.471822 | down |
| DoWRKY55 | 1.97131  | up   | 0.99776  |      | 0.953683 |      |
| DoWRKY57 | 0.902153 |      | 0.2787   | down | 0.222048 | down |
| DoWRKY59 | 0.204969 | down | 0.159935 | down | 0.158516 | down |
| DoWRKY60 | 3.093794 | up   | 3.324029 | up   | 1.270023 |      |
| DoWRKY62 | 3.219542 | up   | 3.072899 | up   | 1.33946  |      |
| DoWRKY63 | 1.051463 |      | 0.526551 | down | 0.51762  | down |
| DoWRKY64 | 0.919817 |      | 0.787801 |      | 0.966855 |      |
| DoWRKY65 | 1.858142 | up   | 3.24689  | up   | 2.614288 | up   |
| DoWRKY66 | 1.198568 |      | 1.89081  | up   | 4.722284 | up   |
| DoWRKY67 | 4.574224 | up   | 4.080856 | up   | 5.714229 | up   |
| DoWRKY68 | 1.078051 |      | 0.923888 |      | 1.139206 |      |
| DoWRKY69 | 2.219858 | up   | 2.710736 | up   | 3.966893 | up   |
| DoWRKY70 | 1.069007 |      | 1.098373 |      | 0.981706 |      |
| DoWRKY72 | 0.762916 |      | 0.719848 |      | 0.588838 | down |
| DoWRKY73 | 0.877409 |      | 0.377186 | down | 0.560843 | down |
| DoWRKY74 | 1.101376 |      | 0.983751 |      | 0.963808 |      |
| DoWRKY75 | 1.166543 |      | 2.184957 | up   | 4.952336 | up   |
| DoWRKY76 | 0.830364 |      | 0.997346 |      | 0.92203  |      |
| DoWRKY77 | 0.877256 |      | 1.169656 |      | 0.958234 |      |
| DoWRKY78 | 0.97714  |      | 1.094654 |      | 1.158122 |      |
| DoWRKY79 | 0.912859 |      | 0.927852 |      | 0.996523 |      |
| DoWRKY80 | 0.8226   |      | 0.930583 |      | 1.017936 |      |
| DoWRKY81 | 0.917666 |      | 0.861284 |      | 0.936427 |      |

Supplementary Table 4 The mean of FPKM value and fold change of *DoWRKY* genes under control and cold stress in *D. officinale* leaf.

| gene name | control (FPKM mean) | cold treatment (FPKM mean) | fold change | regulation |
|-----------|---------------------|----------------------------|-------------|------------|
| DoWRKY1   | 37.58617            | 71.69538                   | 1.907493634 | up         |
| DoWRKY2   | 15.4691833          | 32.09225                   | 2.074592389 | up         |
| DoWRKY3   | 6.51223067          | 2.652049                   |             |            |
| DoWRKY4   | 0.10295867          | 0.070751667                |             |            |
| DoWRKY5   | 13.352947           | 31.55624667                | 2.363242112 | up         |
| DoWRKY6   | 0                   | 0                          |             |            |
| DoWRKY7   | 27.5972333          | 13.59482                   | 0.492615323 | down       |
| DoWRKY9   | 30.98927            | 27.15212667                | 0.876178325 |            |
| DoWRKY10  | 8.505595            | 5.690280333                |             |            |
| DoWRKY12  | 60.25857            | 18.59161                   | 0.308530554 | down       |
| DoWRKY14  | 8.441295            | 29.08249667                | 3.445264816 | up         |
| DoWRKY15  | 34.8969567          | 47.93223667                | 1.373536298 |            |
| DoWRKY18  | 36.6834033          | 37.00455333                | 1.00875464  |            |
| DoWRKY20  | 15.8297733          | 17.197                     | 1.086370578 |            |
| DoWRKY23  | 0.08892367          | 0.037388333                |             |            |
| DoWRKY24  | 2.29150933          | 0.4834                     |             |            |
| DoWRKY25  | 57.2623067          | 77.15656333                | 1.34742325  |            |
| DoWRKY26  | 0.387865            | 0.227979333                |             |            |
| DoWRKY27  | 2.02340867          | 1.396272333                |             |            |
| DoWRKY28  | 0.12857933          | 0.018160333                |             |            |
| DoWRKY30  | 9.92869933          | 3.983945                   |             |            |
| DoWRKY31  | 0.63641567          | 0.572590333                |             |            |
| DoWRKY32  | 2.098979            | 1.558955                   |             |            |
| DoWRKY33  | 0.29632433          | 0.179211                   |             |            |
| DoWRKY35  | 2.813717            | 3.708559                   |             |            |
| DoWRKY37  | 9.139449            | 10.22312433                | 1.118571189 |            |
| DoWRKY39  | 16.0539933          | 16.12359                   | 1.004335162 |            |
| DoWRKY40  | 4.783575            | 0                          |             |            |
| DoWRKY42  | 38.2577567          | 48.31448333                | 1.262867652 |            |
| DoWRKY43  | 19.3435733          | 1.531395667                | 0.079168189 | down       |
| DoWRKY44  | 8.25805333          | 0.214149667                |             |            |
| DoWRKY45  | 56.3398633          | 25.22303333                | 0.447694258 | down       |
| DoWRKY47  | 0.77345367          | 0.312891                   |             |            |
| DoWRKY48  | 0.12363667          | 0.127455667                |             |            |
| DoWRKY49  | 0.32230433          | 0                          |             |            |
| DoWRKY50  | 0.35305167          | 0.094180333                |             |            |
| DoWRKY51  | 0.375303            | 0.124698667                |             |            |
| DoWRKY52  | 9.78057067          | 3.102335                   |             |            |
| DoWRKY53  | 0.29487233          | 0.245218667                |             |            |
| DoWRKY54  | 10.8205053          | 6.922735333                | 0.639779301 | down       |

|          |            |             |             |      |
|----------|------------|-------------|-------------|------|
| DoWRKY55 | 13.2716433 | 1.382748    | 0.104188153 | down |
| DoWRKY57 | 0.110151   | 0           |             |      |
| DoWRKY59 | 0.37069133 | 0.143092333 |             |      |
| DoWRKY60 | 0.37069133 | 0.143092333 |             |      |
| DoWRKY62 | 0.863337   | 0           |             |      |
| DoWRKY63 | 0.863337   | 0           |             |      |
| DoWRKY64 | 0          | 0.197575333 |             |      |
| DoWRKY65 | 28.56497   | 5.491928    | 0.192260941 | down |
| DoWRKY66 | 1.62074967 | 0.191635    |             |      |
| DoWRKY67 | 0.29632433 | 0.179211    |             |      |
| DoWRKY68 | 0.03537267 | 0           |             |      |
| DoWRKY69 | 38.2577567 | 48.31448333 | 1.262867652 |      |
| DoWRKY70 | 0.16028533 | 0           |             |      |
| DoWRKY72 | 0.57739367 | 0.165394333 |             |      |
| DoWRKY73 | 5.22092933 | 1.015809667 |             |      |
| DoWRKY74 | 56.3398633 | 25.22303333 | 0.447694258 | down |
| DoWRKY75 | 1.110346   | 0.895384    |             |      |
| DoWRKY76 | 0.01444067 | 0           |             |      |
| DoWRKY77 | 0          | 0.010516667 |             |      |
| DoWRKY78 | 62.96755   | 26.22064333 | 0.416415175 | down |
| DoWRKY79 | 43.6600433 | 35.29937    | 0.808505153 |      |
| DoWRKY80 | 0.777636   | 0.453810333 |             |      |
| DoWRKY81 | 0          | 0           |             |      |

Supplementary Table 5 The stress-related genes containing W-box elements in tier putative promoters.

| Gene family                                    | Annotation ID             | W-box number | Position                                |
|------------------------------------------------|---------------------------|--------------|-----------------------------------------|
| Ethylene-responsive transcription factor       | Dendrobium_GLEAN_10042967 | 3            | -479, -431, -256                        |
|                                                | Dendrobium_GLEAN_10049982 | 3            | -698, -725, -892                        |
|                                                | Dendrobium_GLEAN_10137828 | 3            | -123, -194, -325                        |
|                                                | Dendrobium_GLEAN_10056217 | 7            | -253, -582, -505, -536, -511, -839, -11 |
|                                                | Dendrobium_GLEAN_10028885 | 3            | -988, -140, -181                        |
| Disease resistance protein                     | Dendrobium_GLEAN_10110403 | 4            | -551, -239, -589, -114                  |
|                                                | Dendrobium_GLEAN_10136594 | 4            | -438, -669, -399, -804                  |
|                                                | Dendrobium_GLEAN_10028570 | 4            | -675, -957, -591, -664                  |
|                                                | Dendrobium_GLEAN_10064426 | 3            | -390, -785, -117                        |
| Heavy metal transport / detoxification protein | Dendrobium_GLEAN_10020160 | 4            | -963, -136, -98, -198                   |
| Peroxidase                                     | Dendrobium_GLEAN_10006492 | 3            | -730, -554, -169                        |
|                                                | Dendrobium_GLEAN_10015395 | 3            | -252, -150, -569                        |
|                                                | Dendrobium_GLEAN_10021680 | 3            | -153, -51, -437                         |
|                                                | Dendrobium_GLEAN_10025405 | 6            | -816, -628, -703, -9, -510, -124        |
|                                                | Dendrobium_GLEAN_10069749 | 4            | -796, -96, -588, -913                   |
| NAC transcription factor                       | Dendrobium_GLEAN_10079456 | 3            | -389, -558, -44                         |
|                                                | Dendrobium_GLEAN_10034487 | 3            | -344, -546, -34                         |
|                                                | Dendrobium_GLEAN_10007482 | 3            | -75, -65, -58                           |
| Dehydration-responsive element-binding protein | Dendrobium_GLEAN_10135906 | 3            | -508, -25, -79                          |
